# Supplementary material for: Bayesian integration of flux tower data into a process-based simulator for quantifying uncertainty in simulated output
Source: Copernicus journal article supplement (doi:10.5194/gmd-11-83-2018), 2018-01-09
Supplement: Supplementary file 1 [file Percentiles_FluxTower_GPP_JD_91_304.xlsx]

## Sheet: AuthorsInfo
			Bayesian integration of ﬂux tower data into process-based simulator for quantifying uncertainty in simulated output R. Raj, N.A.S. Hamm, C. van der Tol, A. Stein Faculty of Geo-Information Science and Earth Observation (ITC), University of Twente, PO Box 217, 7500 AE, Enschede, The Netherlands

## Sheet: FluxTowerGPP
Mean and percentiles of daily GPP in g C m-2 s-1 (for the growing season of 2009) partitioned from flux tower measurements of net ecosystem exchange at the Speulderbos forest site, the Netherlands
Julian day	2.5 percentile	50 percentile (Median)	Mean	97.5 percentile
91	3.07007	3.54028	3.54136	4.00683
92	3.11765	3.57907	3.58061	4.03972
93	3.04541	3.51487	3.51577	3.9783
94	0.890756	1.30321	1.31738	1.8523
95	1.87506	2.30356	2.30768	2.77046
96	2.7415	3.23661	3.23504	3.71016
97	1.46629	1.97725	1.98363	2.55868
98	1.40931	1.95229	1.95959	2.57611
99	1.51591	2.15305	2.16163	2.88976
100	2.82831	3.29686	3.29929	3.7753
101	2.62634	3.02112	3.02165	3.42368
102	2.38767	2.82481	2.82428	3.26312
103	2.94609	3.32538	3.32476	3.70727
104	2.93078	3.29227	3.29199	3.66163
105	3.12653	3.50578	3.50522	3.89044
106	2.34768	2.74333	2.74351	3.1477
107	2.7047	3.08244	3.08233	3.46675
108	3.2946	3.68738	3.68673	4.08422
109	2.8958	3.2991	3.29868	3.70672
110	3.27731	3.66793	3.6677	4.06586
111	4.95773	5.32013	5.32121	5.69434
112	4.73258	5.09153	5.09267	5.4586
113	4.34275	4.69432	4.69469	5.04883
114	4.86756	5.22875	5.23017	5.60011
115	4.34011	4.68172	4.68264	5.03156
116	3.18637	3.52218	3.52305	3.86644
117	3.5514	3.89728	3.89751	4.24803
118	2.33225	2.67901	2.68203	3.05344
119	4.04178	4.43087	4.42994	4.81747
120	4.66186	5.02257	5.02371	5.38936
121	7.44588	7.92939	7.92926	8.41851
122	6.14471	6.58493	6.58599	7.0298
123	5.70406	6.22614	6.22727	6.75078
124	7.94078	8.4525	8.45321	8.96955
125	4.21622	4.63733	4.63874	5.0668
126	3.18879	3.55126	3.55422	3.93279
127	5.99995	6.49623	6.49752	6.99835
128	7.17108	7.68852	7.68973	8.20821
129	7.45674	7.95665	7.95622	8.45185
130	8.22534	8.7558	8.75637	9.29188
131	5.80321	6.27359	6.27337	6.74858
132	5.73109	6.20321	6.20312	6.6799
133	5.913	6.39212	6.39233	6.87701
134	5.2458	5.71253	5.71375	6.18625
135	2.38504	2.71544	2.72152	3.09224
136	5.20832	5.68871	5.69094	6.18297
137	3.63813	4.09115	4.09559	4.57803
138	5.54943	6.04408	6.04501	6.54694
139	5.60327	6.10396	6.10557	6.61473
140	5.86261	6.34903	6.35005	6.84243
141	7.04979	7.72656	7.72618	8.39986
142	7.17185	7.79696	7.79716	8.42173
143	7.16711	7.79227	7.79193	8.41018
144	8.23315	8.94008	8.9402	9.64697
145	7.64433	8.33235	8.33223	9.01757
146	4.87589	5.49483	5.49836	6.13753
147	6.32461	6.93958	6.94001	7.55301
148	7.27535	7.96962	7.96996	8.6544
149	8.42241	9.14603	9.14665	9.86718
150	8.13777	8.84496	8.8443	9.55273
151	9.58381	10.2647	10.2659	10.9498
152	9.62605	10.3058	10.3061	10.9917
153	9.98993	10.7159	10.7173	11.4451
154	6.24293	6.89052	6.89783	7.5837
155	7.37651	7.97963	7.98332	8.60758
156	6.02413	6.57192	6.57816	7.16686
157	8.04081	8.65342	8.65648	9.28205
158	5.20191	5.76019	5.7658	6.35054
159	8.68201	9.30889	9.31081	9.94692
160	7.33252	7.91318	7.91596	8.51303
161	8.32765	8.78756	8.79007	9.26271
162	7.66949	8.09741	8.10028	8.54925
163	11.7244	12.2395	12.243	12.7781
164	11.3201	11.8541	11.8579	12.4134
165	5.79174	6.30028	6.30345	6.84562
166	8.19928	8.76514	8.76494	9.34032
167	8.41073	8.92419	8.92582	9.45997
168	10.8689	11.3659	11.3709	11.8898
169	10.0211	10.4758	10.4783	10.9457
170	10.4286	10.9117	10.9145	11.413
171	6.79592	7.44998	7.45349	8.12139
172	7.14109	7.83264	7.83646	8.5446
173	7.29793	7.9839	7.98688	8.68289
174	8.36045	9.06942	9.07125	9.78619
175	8.21739	8.91472	8.91732	9.62089
176	8.38188	9.09257	9.09456	9.8109
177	6.40983	7.06856	7.07335	7.75541
178	4.2385	4.81783	4.82406	5.44005
179	6.06174	6.63817	6.6438	7.25199
180	7.87058	8.55081	8.55164	9.24089
181	10.9724	11.6875	11.6895	12.4202
182	9.89983	10.5758	10.5766	11.2638
183	10.7011	11.397	11.3983	12.1094
184	9.31639	9.96765	9.96849	10.6343
185	11.1105	11.8304	11.8326	12.5659
186	9.42702	10.0645	10.0655	10.7168
187	9.49711	10.1422	10.1454	10.8022
188	7.4686	8.13672	8.13912	8.81827
189	7.00546	7.60735	7.61118	8.23277
190	8.86322	9.52401	9.52548	10.1964
191	4.35991	4.77975	4.78154	5.21827
192	10.4135	10.8998	10.9017	11.3907
193	5.08977	5.54181	5.54265	6.00602
194	11.056	11.5709	11.5724	12.0889
195	10.7263	11.2278	11.2294	11.7342
196	10.8732	11.3749	11.3767	11.8834
197	11.7285	12.2269	12.229	12.7328
198	8.96071	9.38506	9.38665	9.81325
199	5.2032	5.68913	5.68993	6.18697
200	7.94431	8.43102	8.43158	8.92067
201	10.4808	11.0483	11.0519	11.6316
202	10.5679	11.0836	11.0863	11.6197
203	9.38122	9.86824	9.87141	10.3742
204	6.70246	7.20895	7.21483	7.74586
205	8.43542	9.00939	9.0145	9.60091
206	11.5596	12.1442	12.1478	12.7515
207	11.4945	12.0367	12.0402	12.6025
208	8.55842	9.01046	9.01355	9.48405
209	9.59575	10.1735	10.1773	10.7669
210	8.80307	9.32162	9.32668	9.86479
211	7.08866	7.66876	7.66832	8.25507
212	8.28515	8.92103	8.92196	9.56131
213	7.99375	8.58798	8.58903	9.18791
214	3.31316	3.72522	3.72834	4.1721
215	8.16454	8.80162	8.80313	9.43969
216	8.83137	9.475	9.47606	10.1238
217	8.99738	9.63811	9.63725	10.2742
218	9.15738	9.81112	9.81086	10.4623
219	7.41699	8.0093	8.0096	8.60452
220	2.92865	3.36043	3.36629	3.83971
221	8.25916	8.77629	8.77647	9.30246
222	8.81849	9.30083	9.3025	9.80542
223	7.99434	8.48695	8.48893	8.99596
224	6.19274	6.73532	6.73626	7.29224
225	9.2528	9.79789	9.79881	10.3555
226	10.2524	10.7964	10.7969	11.3534
227	10.8337	11.4188	11.4208	12.0237
228	9.84529	10.3681	10.3692	10.9109
229	9.08751	9.60719	9.60853	10.1408
230	9.84477	10.3703	10.3712	10.914
231	8.85025	9.36856	9.3679	9.88613
232	7.98219	8.45599	8.45511	8.92814
233	7.20674	7.72467	7.72586	8.24981
234	8.3926	8.8989	8.89869	9.41126
235	8.60984	9.11974	9.1193	9.62836
236	8.09653	8.57617	8.57608	9.05692
237	3.64192	4.09951	4.10456	4.59333
238	7.83331	8.32154	8.32108	8.81184
239	5.95979	6.5172	6.51961	7.08192
240	6.17283	6.58106	6.5823	6.99788
241	8.77817	9.19898	9.19837	9.62809
242	5.85166	6.31394	6.31655	6.78991
243	8.78902	9.21278	9.21219	9.64492
244	5.00579	5.46182	5.46417	5.93146
245	7.79749	8.19886	8.19947	8.60583
246	6.22118	6.62746	6.62777	7.03863
247	7.29479	7.68133	7.68173	8.0726
248	7.37626	7.78233	7.78302	8.19485
249	5.49497	5.92478	5.92667	6.36478
250	8.36229	8.76577	8.76518	9.17251
251	6.87813	7.21393	7.21747	7.56865
252	3.79196	4.06726	4.0692	4.35422
253	6.17537	6.45426	6.45622	6.74557
254	5.16631	5.44015	5.44095	5.71757
255	5.88219	6.15412	6.15591	6.43691
256	5.25294	5.53378	5.53495	5.81968
257	4.73231	4.97774	4.97923	5.23009
258	2.00863	2.24539	2.25123	2.52373
259	5.13632	5.39273	5.39408	5.6578
260	5.65894	5.93691	5.93781	6.21907
261	7.55201	8.00367	8.00522	8.45843
262	6.27336	6.66185	6.66443	7.05628
263	5.47878	5.89981	5.90221	6.33398
264	6.93524	7.35554	7.35618	7.77577
265	6.59219	6.9967	6.99893	7.4068
266	5.55403	5.92268	5.92377	6.29545
267	5.97659	6.41003	6.41125	6.84871
268	3.22982	3.57248	3.57567	3.94606
269	6.10717	6.49662	6.49643	6.88362
270	6.37548	6.77586	6.77547	7.17185
271	4.70203	4.98949	4.9886	5.2712
272	1.86346	2.01633	2.01894	2.19048
273	1.97996	2.1416	2.14427	2.32514
274	4.47216	4.74799	4.74717	5.01768
275	3.59808	3.81922	3.81916	4.03792
276	1.96707	2.12036	2.12256	2.29018
277	6.87876	7.22273	7.22124	7.56126
278	1.89192	2.04968	2.05257	2.23114
279	2.51089	2.69228	2.6934	2.88246
280	2.63651	2.81766	2.8179	3.00273
281	2.89574	3.23098	3.23147	3.57618
282	3.63185	3.92868	3.92814	4.22328
283	1.69247	1.95748	1.96098	2.25092
284	1.25006	1.4857	1.49107	1.76136
285	3.09215	3.38921	3.38942	3.68945
286	3.41547	3.71083	3.71022	4.0024
287	3.64378	3.93279	3.93254	4.22196
288	3.45048	3.73253	3.73211	4.01413
289	2.66703	2.94437	2.94469	3.22687
290	3.01257	3.29919	3.29937	3.58851
291	3.0085	3.22577	3.22667	3.44113
292	1.18582	1.35022	1.3592	1.58155
293	3.0497	3.27069	3.27157	3.49054
294	2.49422	2.69372	2.69512	2.90407
295	0.821236	0.936602	0.943143	1.10115
296	2.41991	2.63801	2.64038	2.87469
297	0.88952	1.01353	1.02045	1.18934
298	1.91901	2.10573	2.11062	2.32744
299	0.897531	1.02256	1.02952	1.19971
300	1.47212	1.65618	1.6638	1.90002
301	2.35531	2.71744	2.71703	3.07734
302	1.775	2.08885	2.08621	2.38985
303	1.9858	2.28021	2.27936	2.5735
304	2.00912	2.30755	2.3065	2.60407
