# Supplementary material for: Bayesian integration of flux tower data into a process-based simulator for quantifying uncertainty in simulated output
Source: Copernicus journal article supplement (doi:10.5194/gmd-11-83-2018), 2018-01-09
Supplement: Supplementary file [file gmd-11-83-2018-supplement-title-page.pdf › gmd-11-83-2018-supplement-title-page.pdf]

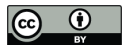

## *Supplement of*

# **Bayesian integration of flux tower data into a process-based simulator for quantifying uncertainty in simulated output**

**Rahul Raj et al.**

*Correspondence to:* Rahul Raj ([r.raj@utwente.nl](mailto:r.raj@utwente.nl), [rahulosho@gmail.com](mailto:rahulosho@gmail.com))

- [gmd-11-83-2018-supplement-title-page.pdf](#)
- [BIOME-BGCrunScript.m](#)
- [DREAM\\_setup.m](#)
- [Meanpm.epc](#)
- [Percentiles\\_FluxTower\\_GPP\\_JD\\_91\\_304.xlsx](#)
- [Speuld2009.mtc41](#)
- [TowerGPP.txt](#)
- [enf\\_speuld\\_Main.ini](#)

The copyright of individual parts of the supplement might differ from the CC BY 3.0 License.
